# Supplementary material for: Pesticide exposure affects flight dynamics and reduces flight endurance in bumblebees
Source: PubMed Central journal article supplement (PMC6540668; doi:10.1002/ece3.5143), 2019-04-29
Supplement: ECE3-9-5637-s002.pdf [file ECE3-9-5637-s002.pdf]

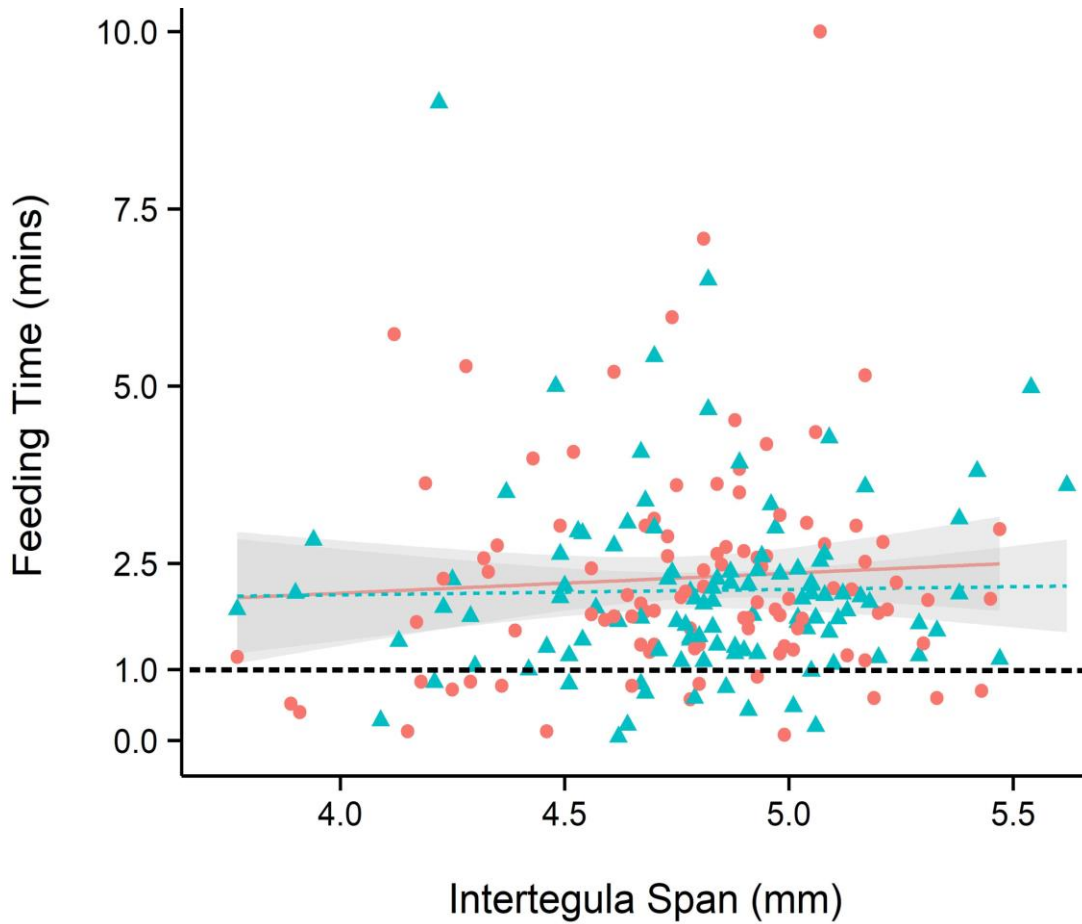

**Figure S2. Scatter plot showing no significant relationship between length of feeding time and body size (*ITS*) for *control* (red circle) and *pesticide* exposed (blue triangle) workers.** There were 222 bees selected for testing (*control* = 111, *pesticide* = 111), of which 209 initiated feeding (*control* = 102, *pesticide* = 107). The dashed black line corresponds with a feeding time of 60 seconds, and all bees that fed below this (*control* = 16, *pesticide* = 13) were not considered in the main flight analysis. Linear fitted lines (*control* = solid red, *pesticide* = dashed blue) with associated standard error (shaded bands) are estimates of linear models.
