# Supplementary material for: Pesticide exposure affects flight dynamics and reduces flight endurance in bumblebees
Source: PubMed Central journal article supplement (PMC6540668; doi:10.1002/ece3.5143), 2019-04-29
Supplement: ECE3-9-5637-s003.pdf [file ECE3-9-5637-s003.pdf]

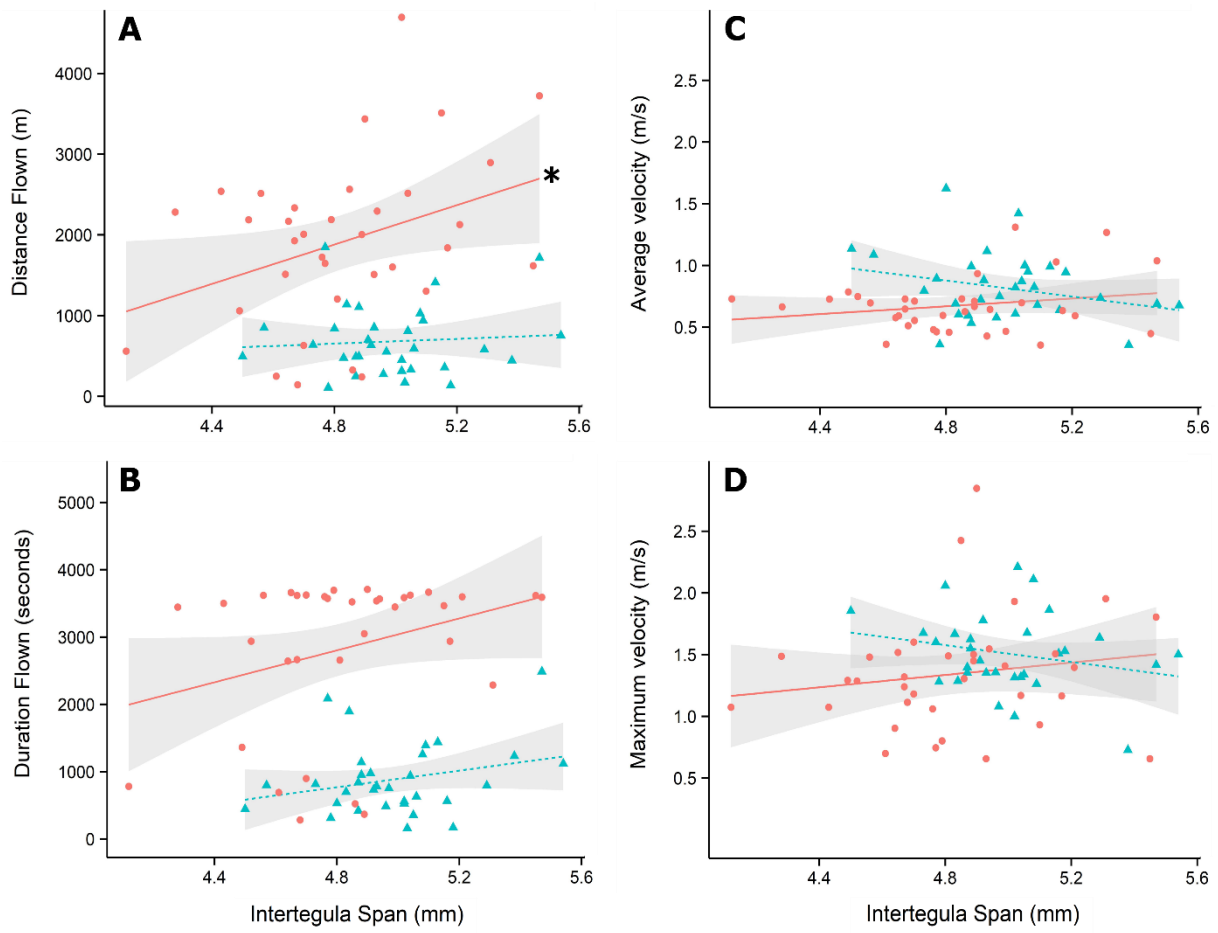

**Figure S3. Scatterplot showing key flight performance indicators of endurance (distance flown in meters (A); duration flown in seconds (B)) and average and maximum velocity in meters per second (C-D) against worker body size (ITS) for both the control (red circle) and pesticide treated (blue treatment) groups. Data plotted are for the full dataset of bees ( $n = 35$  control;  $32$  pesticide; see Table 1 – filter step 6), and linear fitted lines (control = solid red, pesticide = dashed blue) with associated standard error (shaded bands) are estimates of linear models. An asterisk (\*) indicates a significant ( $p < 0.05$ ) relationship.**
